# Supplementary material for: A Novel Tiled Amplicon Sequencing Assay Targeting the Tomato Brown Rugose Fruit Virus (ToBRFV) Genome Reveals Widespread Distribution in Municipal Wastewater Treatment Systems in the Province of Ontario, Canada
Source: MDPI journal article supplement (doi:10.3390/v16030460), 2024-03-17
Supplement: s1 [file s1]

**Table S2.** Accession numbers of 179 ToBRFV Strains obtained from NCBI. ToBRFV genomes listed on NextStrain used to design primers and phylogenetic analysis. The strains used for tree building (PhyML Tree), assigned clades (Clade), and genomes used for read simulation (Sim. Reads) are listed. Unique strain genomes used in our PhyML tree are denoted yes (PhyML Tree), identical genomes are denoted no and the representative genome used in the PhyML Tree is listed (Rep. Genome). Strains were assigned to the same clade by both our PhyML tree and the NextStrain build, with the expectation of some clade 5 strains. Clade 5 strains predicted by NextStrain but not our analysis are labeled 5(N).

| Accession | PhyML Tree | Rep. Genome | Clade | Sim. Reads |
|-----------|------------|-------------|-------|------------|
| OM515230  | yes        | -           | 3     | -          |
| OM515231  | yes        | -           | -     | -          |
| OM515232  | yes        | -           | -     | -          |
| OM515233  | yes        | -           | 8     | -          |
| OM515234  | yes        | -           | -     | -          |
| OM515235  | yes        | -           | 8     | -          |
| OM515236  | yes        | -           | 3     | yes        |
| OM515237  | yes        | -           | -     | -          |
| OM515238  | yes        | -           | 3     | -          |
| OM515239  | yes        | -           | 1     | yes        |
| OM515240  | yes        | -           | 3     | -          |
| OM515241  | yes        | -           | 1     | -          |
| OM515242  | yes        | -           | 3     | -          |
| OM515243  | no         | MW314135    | 7     | yes        |
| OM515244  | yes        | -           | 3     | -          |
| OM515245  | yes        | -           | 7     | -          |
| OM515246  | yes        | -           | 7     | -          |
| OM515247  | yes        | -           | 7     | -          |
| OM515248  | no         | OM515255    | 7     | -          |
| OM515249  | no         | OM515252    | 7     | -          |
| OM515250  | yes        | -           | -     | -          |
| OM515251  | no         | OM515252    | 7     | -          |
| OM515252  | yes        | -           | 7     | -          |
| OM515253  | no         | OM515255    | 7     | -          |
| OM515254  | yes        | -           | 7     | -          |
| OM515255  | yes        | -           | 7     | -          |
| OM515256  | yes        | -           | -     | -          |
| OM515257  | no         | OM515266    | -     | -          |
| OM515258  | yes        | -           | 8     | yes        |
| OM515259  | yes        | -           | 7     | -          |
| OM515260  | no         | OM515245    | 7     | -          |
| OM515261  | yes        | -           | 1     | -          |
| OM515262  | yes        | -           | -     | -          |
| OM515263  | yes        | -           | 3     | -          |

|          |     |          |       |     |
|----------|-----|----------|-------|-----|
| OM515264 | yes | -        | 6     | -   |
| OM515265 | yes | -        | 7     | -   |
| OM515266 | yes | -        | -     | -   |
| OM515267 | yes | -        | 3     | -   |
| OM515268 | no  | OM515255 | 7     | -   |
| OM515269 | no  | OM515245 | 7     | -   |
| OM515270 | yes | -        | 1     | -   |
| OM515271 | yes | -        | 7     | -   |
| OM515272 | yes | -        | 7     | -   |
| OM718702 | yes | -        | 7     | -   |
| OM718703 | yes | -        | 7     | -   |
| OM718704 | yes | -        | 7     | -   |
| OM718705 | no  | OM515255 | 7     | -   |
| OM718706 | yes | -        | 1     | -   |
| MZ945419 | no  | MZ945420 | 1     | -   |
| MZ945420 | yes | -        | 1     | -   |
| MW349655 | yes | -        | 4     | -   |
| MZ323110 | yes | -        | 5     | -   |
| MZ438228 | yes | -        | 5     | -   |
| MZ202349 | yes | -        | 5 (N) | -   |
| MZ004925 | yes | -        | 5 (N) | -   |
| MT018320 | yes | -        | 5 (N) | -   |
| MW314091 | yes | -        | 5     | -   |
| MW314092 | yes | -        | 2     | yes |
| MW314093 | no  | MN882033 | 2     | -   |
| MW314094 | yes | -        | 2     | -   |
| MW314095 | no  | MW314097 | 3     | -   |
| MW314096 | no  | MW314097 | 3     | -   |
| MW314097 | yes | -        | 3     | -   |
| MW314098 | no  | MW314097 | 3     | -   |
| MW314099 | no  | MW314101 | 3     | -   |
| MW314100 | no  | MW314101 | 3     | -   |
| MW314101 | yes | -        | 3     | -   |
| MW314102 | no  | MN882034 | 3     | -   |
| MW314103 | yes | -        | 3     | -   |
| MW314104 | no  | MW314105 | 5     | -   |
| MW314105 | yes | -        | 5     | -   |
| MW314106 | yes | -        | 1     | -   |
| MW314107 | no  | MW314109 | 5     | -   |
| MW314108 | yes | -        | 5     | -   |
| MW314109 | yes | -        | 5     | -   |
| MW314110 | yes | -        | 5     | -   |
| MW314111 | yes | -        | 8     | -   |
| MW314112 | yes | -        | 1     | -   |
| MW314113 | yes | -        | -     | -   |
| MW314114 | yes | -        | 5     | -   |
| MW314115 | no  | MW314116 | -     | -   |

|          |     |          |       |     |
|----------|-----|----------|-------|-----|
| MW314116 | yes | -        | -     | -   |
| MW314117 | yes | -        | -     | -   |
| MW314118 | yes | -        | 1     | -   |
| MW314119 | no  | MW314120 | 1     | -   |
| MW314120 | yes | -        | 1     | -   |
| MW314121 | yes | -        | 3     | -   |
| MW314122 | yes | -        | 3     | -   |
| MW314123 | yes | -        | 6     | yes |
| KT383474 | yes | -        | 5     | -   |
| MW314124 | no  | MW314125 | 1     | -   |
| MW314125 | yes | -        | 1     | -   |
| MW314126 | yes | -        | 3     | -   |
| MW314127 | yes | -        | 3     | -   |
| MW314128 | yes | -        | 1     | -   |
| MW314129 | no  | MW314136 | 3     | -   |
| MW314130 | yes | -        | 1     | -   |
| MW314131 | yes | -        | 1     | -   |
| MW314132 | no  | MW314137 | 1     | -   |
| MW314133 | no  | MW314135 | 7     | -   |
| MW314134 | no  | MW314135 | 7     | -   |
| MW314135 | yes | -        | 7     | -   |
| MW314136 | yes | -        | 3     | -   |
| MW314137 | yes | -        | 1     | -   |
| MP872414 | no  | KT383474 | 5     | -   |
| MP872415 | no  | KX619418 | 5 (N) | -   |
| MP875816 | no  | KT383474 | 5     | -   |
| MP875817 | no  | KX619418 | 5 (N) | -   |
| MN549394 | yes | -        | 4     | yes |
| MN549395 | yes | -        | 4     | -   |
| MN549396 | yes | -        | 4     | -   |
| MT002973 | yes | -        | 4     | -   |
| MT107885 | yes | -        | 5 (N) | -   |
| MT118666 | no  | KX619418 | 5 (N) | -   |
| MN882011 | yes | -        | 3     | -   |
| MN882012 | yes | -        | 1     | -   |
| MN882013 | yes | -        | 1     | -   |
| MN882014 | yes | -        | 1     | -   |
| MN882015 | yes | -        | 1     | -   |
| MN882016 | yes | -        | 1     | -   |
| MN882017 | yes | -        | 1     | -   |
| MN882018 | yes | -        | 1     | -   |
| MN882019 | no  | MN882020 | 3     | -   |
| MN882020 | yes | -        | 3     | -   |
| MN882021 | yes | -        | 3     | -   |
| MN882022 | no  | MN882034 | 3     | -   |
| MN882023 | no  | MN882034 | 3     | -   |
| MN882024 | no  | MN882034 | 3     | -   |

|          |     |          |       |   |
|----------|-----|----------|-------|---|
| MN882025 | no  | MN882064 | 3     | - |
| MN882026 | no  | MN882027 | 1     | - |
| MN882027 | yes | -        | 1     | - |
| MN882028 | no  | MN882029 | 3     | - |
| MN882029 | yes | -        | 3     | - |
| MN882030 | no  | MN882033 | 2     | - |
| MN882031 | no  | MN882033 | 2     | - |
| MN882032 | no  | MN882033 | 2     | - |
| MN882033 | yes | -        | 2     | - |
| MN882034 | yes | -        | 3     | - |
| MN882035 | no  | MN882034 | 3     | - |
| MN882036 | yes | -        | 3     | - |
| MN882037 | no  | MN882040 | 1     | - |
| MN882038 | no  | MN882040 | 1     | - |
| MN882039 | no  | MN882040 | 1     | - |
| MN882040 | yes | -        | 1     | - |
| MN882041 | yes | -        | 1     | - |
| MN882042 | no  | MN882043 | 6     | - |
| MN882043 | yes | -        | 6     | - |
| MN882044 | no  | MN882045 | 1     | - |
| MN882045 | yes | -        | 1     | - |
| MN882046 | no  | MN882047 | 1     | - |
| MN882047 | yes | -        | 1     | - |
| MN882048 | yes | -        | 3     | - |
| MN882049 | no  | MN882050 | 3     | - |
| MN882050 | yes | -        | 3     | - |
| MN882051 | yes | -        | 1     | - |
| MN882052 | yes | -        | 1     | - |
| MN882053 | yes | -        | 1     | - |
| MN882054 | yes | -        | 1     | - |
| MN882055 | yes | -        | 1     | - |
| MN882056 | no  | MN882015 | 1     | - |
| MN882057 | yes | -        | 1     | - |
| MN882058 | yes | -        | 1     | - |
| MN882059 | no  | MN882060 | 1     | - |
| MN882060 | yes | -        | 1     | - |
| MN882061 | no  | MN882062 | 1     | - |
| MN882062 | yes | -        | 1     | - |
| MN882063 | no  | MN882064 | 3     | - |
| MN882064 | yes | -        | 3     | - |
| MN815773 | yes | -        | -     | - |
| MN013187 | yes | -        | 5 (N) | - |
| MN013188 | yes | -        | 5 (N) | - |
| MN182533 | yes | -        | 1     | - |
| MK648157 | yes | -        | 5 (N) | - |
| MN167466 | yes | -        | 3 (5) | - |
| MK319944 | yes | -        | 4     | - |

|          |     |   |       |     |
|----------|-----|---|-------|-----|
| MK165457 | yes | - | 5 (N) | yes |
| MK133093 | yes | - | 5 (N) | -   |
| MK133095 | yes | - | 3     | -   |
| KX619418 | yes | - | 5 (N) | -   |

---
