# Supplementary material for: A Novel Tiled Amplicon Sequencing Assay Targeting the Tomato Brown Rugose Fruit Virus (ToBRFV) Genome Reveals Widespread Distribution in Municipal Wastewater Treatment Systems in the Province of Ontario, Canada
Source: MDPI journal article supplement (doi:10.3390/v16030460), 2024-03-17
Supplement: s1 [file s1]

**Table S4.** Twenty-Six Virus Species common to all five wastewater influent shotgun samples.

Virus Species

Acanthamoeba polyphaga moumouvirus  
Cactus virus X  
Choristoneura fumiferana granulovirus  
Cucumber green mottle mosaic virus  
Emesvirus japonicum  
Emesvirus zinderi  
Enterobacteria phage GA  
Enterobacteria phage Hgal1  
Escherichia phage MS2  
Garlic common latent virus  
Garlic virus A  
Hagavirus psychrophilum  
Hubei picorna-like virus 61  
Moumouvirus  
Norwalk virus  
Pepino mosaic virus  
Pepper mild mottle virus  
Pitaya virus X  
Rehmannia mosaic virus  
Schlumbergera virus X  
Squash mosaic virus  
Tobacco mild green mosaic virus  
Tobacco mosaic virus  
Tomato brown rugose fruit virus  
Tomato mosaic virus  
Wuhan insect virus 23
