# Supplementary material for: A Novel Tiled Amplicon Sequencing Assay Targeting the Tomato Brown Rugose Fruit Virus (ToBRFV) Genome Reveals Widespread Distribution in Municipal Wastewater Treatment Systems in the Province of Ontario, Canada
Source: MDPI journal article supplement (doi:10.3390/v16030460), 2024-03-17
Supplement: s1 [file s1]

**Table S3.** List of ToBRFV-Seq Primer Sequences and Concentration of Pooled Primers.

| Primer Name     | Pool | Sequence                         | Size | %GC   | Tm    | [Pool]      |
|-----------------|------|----------------------------------|------|-------|-------|-------------|
| ToBRFV_1_LEFT   | 1    | TTTACAAC TACAATGGC ATACACACA     | 26   | 34.62 | 59.95 | 0.5 $\mu$ M |
| ToBRFV_1_RIGHT  | 1    | ATTGGGCATACAGCAGTGAACA           | 22   | 45.45 | 60.74 | 0.5 $\mu$ M |
| ToBRFV_2_LEFT   | 2    | AATGATGCAGATCCCGTACGGA           | 22   | 50    | 61.79 | 0.5 $\mu$ M |
| ToBRFV_2_RIGHT  | 2    | CGGCGTAACAAACATGGACATT           | 22   | 45.45 | 60.27 | 0.5 $\mu$ M |
| ToBRFV_3_LEFT   | 1    | TGCTATTGCATTGCACAGTATATACG       | 26   | 38.46 | 60.56 | 0.5 $\mu$ M |
| ToBRFV_3_RIGHT  | 1    | TGCGCTGTAAAATTGCTCACTAT          | 23   | 39.13 | 59.56 | 0.5 $\mu$ M |
| ToBRFV_4_LEFT   | 2    | ACACCTGGTTTTGTAAAGTTTTCTAGG      | 26   | 38.46 | 60.12 | 0.5 $\mu$ M |
| ToBRFV_4_RIGHT  | 2    | CTGGCAGTCACTCCGTTGATAA           | 22   | 50    | 60.53 | 0.5 $\mu$ M |
| ToBRFV_5_LEFT   | 1    | GCACTTATCAAGCCAAGGCACT           | 22   | 50    | 61.64 | 0.5 $\mu$ M |
| ToBRFV_5_RIGHT  | 1    | ATCAAGCACTGGCATATCCACC           | 22   | 50    | 60.93 | 0.5 $\mu$ M |
| ToBRFV_6_LEFT   | 2    | CGCATTAGAAATCAGGGTGCCT           | 22   | 50    | 61.19 | 0.5 $\mu$ M |
| ToBRFV_6_RIGHT  | 2    | CCTCTTGCCATTGAACCCCTCA           | 22   | 50    | 61    | 0.5 $\mu$ M |
| ToBRFV_7_LEFT   | 1    | TGTCGCATTGGCACTTAAAGATT          | 23   | 39.13 | 59.75 | 0.5 $\mu$ M |
| ToBRFV_7_RIGHT  | 1    | TGGTCGCAACATCTAAGACTCC           | 22   | 50    | 60.27 | 0.5 $\mu$ M |
| ToBRFV_8_LEFT   | 2    | CGGTGTCGAACCTAGTCAAGAT           | 22   | 50    | 60.02 | 0.5 $\mu$ M |
| ToBRFV_8_RIGHT  | 2    | CGGTACTAAGATTAGATCTTCCTCAAAAT    | 29   | 34.48 | 59.77 | 0.5 $\mu$ M |
| ToBRFV_9_LEFT   | 1    | GCAGTGCTAAAGTCGCTCCTAGT          | 22   | 50    | 60.27 | 0.5 $\mu$ M |
| ToBRFV_9_RIGHT  | 1    | GAGTTTCCACCTCATCAACCTCT          | 23   | 47.83 | 60.25 | 0.5 $\mu$ M |
| ToBRFV_10_LEFT  | 2    | TGGAGACACACAACAAATCCATAC         | 25   | 40    | 60.14 | 0.5 $\mu$ M |
| ToBRFV_10_RIGHT | 2    | GCGATGATAGATACAGGTGTCGG          | 23   | 52.17 | 60.92 | 0.5 $\mu$ M |
| ToBRFV_11_LEFT  | 1    | ACGGACGTCCATACAGTACATG           | 22   | 50    | 60.08 | 0.5 $\mu$ M |
| ToBRFV_11_RIGHT | 1    | CAGCATCATAGTTATTTAACATGGTGC      | 27   | 37.04 | 59.89 | 0.5 $\mu$ M |
| ToBRFV_12_LEFT  | 2    | GATGCAGGGACCCAATAGCAAT           | 22   | 50    | 60.94 | 0.5 $\mu$ M |
| ToBRFV_12_RIGHT | 2    | TCTACTACCAAAGATGCAGTATTCTCA      | 27   | 37.04 | 60.15 | 0.5 $\mu$ M |
| ToBRFV_13_LEFT  | 1    | TTGGAAAATTTGGTGGCGATGA           | 22   | 40.91 | 59.55 | 0.5 $\mu$ M |
| ToBRFV_13_RIGHT | 1    | TTTGCCTTGTGAGCTCACTGAA           | 22   | 45.45 | 60.87 | 0.5 $\mu$ M |
| ToBRFV_14_LEFT  | 2    | TTCAAAGCGAATATCCGGCCTT           | 22   | 45.45 | 60.86 | 0.5 $\mu$ M |
| ToBRFV_14_RIGHT | 2    | TGAATGTTGTAAACGTCCCACT           | 22   | 45.45 | 60.08 | 0.5 $\mu$ M |
| ToBRFV_15_LEFT  | 1    | ACAAGGCCACAGGAAAAC TACT          | 22   | 45.45 | 60.01 | 0.5 $\mu$ M |
| ToBRFV_15_RIGHT | 1    | TGAACTCTTCTAAGTGATCCCAATCC       | 26   | 42.31 | 60.8  | 0.5 $\mu$ M |
| ToBRFV_16_LEFT  | 2    | ACGTGATACATCATGACAGAGGG          | 23   | 47.83 | 60.18 | 0.5 $\mu$ M |
| ToBRFV_16_RIGHT | 2    | TGAACCAATATCTTATCAACCTTGGAGA     | 28   | 35.71 | 60.88 | 0.5 $\mu$ M |
| ToBRFV_17_LEFT  | 1    | TGAGTTCATAGACTTGTCAAAATCAGAA     | 28   | 32.14 | 59.87 | 0.5 $\mu$ M |
| ToBRFV_17_RIGHT | 1    | CGCAGCAATTTTAACATTCTAATATTAACGAG | 33   | 30.3  | 62    | 0.5 $\mu$ M |
| ToBRFV_18_LEFT  | 2    | GGTTTCAGTTCAAAGTCGTTCCA          | 23   | 43.48 | 59.87 | 0.5 $\mu$ M |
| ToBRFV_18_RIGHT | 2    | TCCTTCTCAACCC TAACTTTTAAACC      | 26   | 38.46 | 59.67 | 0.5 $\mu$ M |
| ToBRFV_19_LEFT  | 1    | ACCGGGAAAAAGTTTAGTAGTAAAAGTG     | 28   | 35.71 | 60.76 | 0.5 $\mu$ M |
| ToBRFV_19_RIGHT | 1    | AGGATCTAGTACCGCATTGTACCT         | 24   | 45.83 | 61.02 | 0.5 $\mu$ M |
| ToBRFV_20_LEFT  | 2    | GGCCGACCCTATAGAATTAATAAATTTATGT  | 31   | 32.26 | 60.84 | 0.5 $\mu$ M |
| ToBRFV_20_RIGHT | 2    | GGTGCAGAGGACCATTGTAAAC           | 22   | 50    | 59.69 | 0.5 $\mu$ M |
