# Supplementary material for: A Novel Tiled Amplicon Sequencing Assay Targeting the Tomato Brown Rugose Fruit Virus (ToBRFV) Genome Reveals Widespread Distribution in Municipal Wastewater Treatment Systems in the Province of Ontario, Canada
Source: MDPI journal article supplement (doi:10.3390/v16030460), 2024-03-17
Supplement: s1 [file s1]

**Table S1.** List of sample sites, type of collection system, serviced population size, and raw data accessions.

| Sample | Region    | Collection Site | Collection System           | Population | Sample Type    | Collection Date | Prep. Date     | RNA-Seq data accession | <i>ToBRFV</i> -Seq data accession |
|--------|-----------|-----------------|-----------------------------|------------|----------------|-----------------|----------------|------------------------|-----------------------------------|
| A      | Kingston  | Cataraqui Bay   | Wastewater Treatment Plant  | 52 084     | 24-h composite | June 28th 2023  | July 17th 2023 | SAMN37915769           | SAMN37915775                      |
| B      | Peel      | GE Booth        | Wastewater Treatment Plant  | 1 089 738  | 24-h composite | July 10th 2023  | July 17th 2023 | SAMN37915770           | SAMN37915776                      |
| C      | Cambridge | Cambridge       | Wastewater Treatment Plant  | 89 714     | 24-h composite | July 10th 2023  | July 17th 2023 | SAMN37915771           | SAMN37915777                      |
| D      | York      | Warden - 407    | Linear Pipe Collection Site | 650 303    | Grab           | July 10th 2023  | July 17th 2023 | SAMN37915772           | SAMN37915778                      |
| E      | York      | Leslie Street   | Pumping Station             | 295 232    | Grab           | July 10th 2023  | July 17th 2023 | SAMN37915773           | SAMN37915779                      |
